# Supplementary material for: Prevalence of Hearing Loss and Hearing Aid Use Among US Medicare Beneficiaries Aged 71 Years and Older
Source: PubMed Central journal article supplement (PMC10383002; doi:10.1001/jamanetworkopen.2023.26320), 2023-07-28
Supplement: jamanetwopen-e2326320-s001.pdf [file jamanetwopen-e2326320-s001.pdf]

## Supplemental Online Content

Reed NS, Garcia-Morales EE, Myers C, et al. Prevalence of hearing loss and hearing aid use among US Medicare beneficiaries aged 71 years and older. *JAMA Netw Open*. 2023;6(7):e2326320.

doi:10.1001/jamanetworkopen.2023.26320

**eTable 1.** Prevalence Estimates of Adults  $\geq 71$  Years in the United States With Hearing Loss According to Updated World Health Organization Hearing Severity Categories<sup>a</sup> by Age: National Health Aging Trends Study<sup>b</sup>

**eTable 2.** Number Estimates of Adults  $\geq 71$  Years in the United States With Hearing Loss by Sex, Race/Ethnicity, and Age: National Health Aging Trends Study<sup>a</sup>

**eTable 3.** Prevalence and Number Estimates of Hearing Aid Use Among Adults  $\geq 71$  Years With Hearing Loss in the United States by Select Sociodemographic Characteristics: National Health Aging Trends Study<sup>a</sup>

This supplemental material has been provided by the authors to give readers additional information about their work.

**eTable 1.** Prevalence Estimates of Adults  $\geq 71$  Years in the United States With Hearing Loss According to Updated World Health Organization Hearing Severity Categories<sup>a</sup> by Age: National Health Aging Trends Study<sup>b</sup>

| Age, y      | Prevalence, % (95% CI) |                      |                      |                                 |                      |
|-------------|------------------------|----------------------|----------------------|---------------------------------|----------------------|
|             | Hearing Loss Category  |                      |                      |                                 |                      |
|             | Mild                   | Moderate             | Moderately-Severe    | $\geq$ Severe                   | Any HL               |
| 71-74y      | 48.9<br>(43.9, 53.8)   | 21.6<br>(16.9, 26.3) | 5.7<br>(2.8, 8.5)    | 0.8<br>(-0.1, 1.7) <sup>c</sup> | 76.9<br>(73.1, 80.7) |
| 75-79y      | 43.7<br>(39.2, 48.1)   | 28.4<br>(24.6, 32.3) | 8.7<br>(6.8, 10.6)   | 2.1<br>(0.7, 3.4)               | 82.9<br>(79.5, 86.2) |
| 80-84y      | 36.2<br>(32.0, 40.4)   | 35.2<br>(30.5, 39.9) | 14.6<br>(11.1, 18.1) | 4.0<br>(2.2, 5.7)               | 89.9<br>(87.1, 92.8) |
| 85-89y      | 29.7<br>(24.5, 35.0)   | 39.3<br>(34.5, 44.1) | 20.1<br>(16.6, 23.7) | 7.8<br>(5.4, 10.1)              | 96.8<br>(95.4, 98.3) |
| $\geq 90$ y | 12.6<br>(8.5, 16.7)    | 36.5<br>(30.6, 42.3) | 35.5<br>(29.3, 41.7) | 15.1<br>(10.8, 19.3)            | 99.7<br>(99.1, 100)  |
| Overall     | 42.3<br>(39.2, 45.4)   | 27.9<br>(25.4, 30.6) | 10.3<br>(8.9, 12.0)  | 2.8<br>(2.2, 3.5)               | 83.3<br>(81.5, 85.0) |

Note. CI=confidence interval; y=years; HL=Hearing loss.

Source. National Health Aging Trends Study. Data weighted according to study guidelines.

<sup>a</sup> Hearing loss severity is defined based on a four-frequency (0.5/1/2/4 kHz) pure tone average threshold for the better-hearing ear (no hearing loss :  $< 20$  dB HL, mild: 20-34.9 dB HL, moderate 35-49.9 dB HL, moderately severe 50-64.9 dB HL, severe or greater  $\geq 65$  dB HL)

<sup>b</sup> NHATS 2021 cycle N=2803

<sup>c</sup> Weighted estimate based on less than 10 individuals per cell either in the hearing loss or normal hearing group in the unweighted data.

**eTable 2.** Number Estimates of Adults  $\geq 71$  Years in the United States With Hearing Loss by Sex, Race/Ethnicity, and Age: National Health Aging Trends Study<sup>a</sup>

|            | Number with hearing loss (millions) (95% CI) <sup>b</sup> |                    |                             |                   |                                |
|------------|-----------------------------------------------------------|--------------------|-----------------------------|-------------------|--------------------------------|
|            | Sex                                                       |                    | Race/Ethnicity <sup>c</sup> |                   |                                |
| Age, y     | Female                                                    | Male               | White                       | Black             | Hispanic                       |
| 71-75y     | 2.8<br>(2.4, 3.2)                                         | 3.1<br>(2.7, 3.5)  | 5.2<br>(4.5, 5.9)           | 0.3<br>(0.2, 0.4) | 0.2<br>(0.0, 0.5) <sup>d</sup> |
| 75-80y     | 3.1<br>(2.8, 3.4)                                         | 3.0<br>(2.7, 3.3)  | 5.2<br>(4.8, 5.5)           | 0.3<br>(0.2, 0.3) | 0.4<br>(0.3, 0.6)              |
| 80-85y     | 2.3<br>(2.2, 2.5)                                         | 2.2<br>(2.1, 2.4)  | 3.8<br>(3.6, 4.1)           | 0.4<br>(0.3, 0.4) | 0.2<br>(0.1, 0.2) <sup>d</sup> |
| $\geq 85y$ | 3.5<br>(3.4, 3.6)                                         | 2.0<br>(1.9, 2.0)  | 4.6<br>(4.5, 4.8)           | 0.3<br>(0.3, 0.3) | 0.3<br>(0.2, 0.3) <sup>d</sup> |
| Overall    | 11.4<br>(10.7, 12.1)                                      | 10.0<br>(9.3, 6.8) | 18.3<br>(17.2, 19.2)        | 1.3<br>(1.2, 1.5) | 1.2<br>(0.9, 1.5)              |

*Note.* CI=confidence interval; y=years. Hearing loss severity is defined based on a four-frequency (0.5/1/2/4 kHz) pure tone average threshold for the better-hearing ear (no hearing loss :  $\leq 25$  dB HL, mild: 26-40 dB HL, moderate: 41-60, and severe or greater  $>60$  dB HL)

*Source.* National Health Aging Trends Study. Data weighted according to study guidelines.

<sup>a</sup> NHATS 2021 cycle N=2803

<sup>b</sup> Population numbers were computed using the estimated prevalence rate and the population totals by age group in the continental USA according to data from the 2020 Census Bureau, American Community Survey

<sup>c</sup> Prevalence estimates by race/ethnicity are only presented for the 3 largest racial/ethnic groups. Individuals from all racial/ethnic groups were included in all other prevalence estimations.

<sup>d</sup> Weighted estimate based on less than 10 individuals per cell either in the hearing loss or normal hearing group in the unweighted data.

**eTable 3.** Prevalence and Number Estimates of Hearing Aid Use Among Adults  $\geq 71$  Years With Hearing Loss in the United States by Select Sociodemographic Characteristics: National Health Aging Trends Study<sup>a</sup>

|                                   | Prevalence, %<br>(95% CI) | Number (millions)<br>(95% CI) <sup>b</sup> |
|-----------------------------------|---------------------------|--------------------------------------------|
| <b>Overall</b>                    | 29.2<br>(26.6, 31.9)      | 6.4<br>(5.8, 7.1)                          |
| <b>Age, y</b>                     |                           |                                            |
| 71-75y                            | 28.2<br>(21.8, 35.5)      | 1.7<br>(1.2, 2.2)                          |
| 75-80y                            | 25.5<br>(22.1, 29.3)      | 1.6<br>(1.4, 1.9)                          |
| 80-85y                            | 31.2<br>(27.3, 35.3)      | 1.4<br>(1.2, 1.6)                          |
| $\geq 85y$                        | 36.9<br>(33.2, 40.8)      | 2.0<br>(1.8, 2.2)                          |
| <b>Hearing Loss Severity</b>      |                           |                                            |
| Mild                              | 14.4<br>(11.1, 18.3)      | 1.7<br>(1.2, 2.2)                          |
| Moderate                          | 45.3<br>(40.5, 50.1)      | 3.6<br>(3.1, 4.0)                          |
| $\geq$ Severe                     | 67.9<br>(58.8, 75.9)      | 0.9<br>(0.6, 1.1)                          |
| <b>Sex</b>                        |                           |                                            |
| Male                              | 35.1<br>(30.6, 39.9)      | 3.6<br>(3.0, 4.1)                          |
| Female                            | 23.4<br>(20.6, 26.4)      | 2.7<br>(2.4, 3.1)                          |
| <b>Race/Ethnicity<sup>c</sup></b> |                           |                                            |
| White                             | 32.1<br>(29.2, 35.1)      | — <sup>d</sup>                             |
| Black                             | 8.4<br>(5.3, 13.0)        | — <sup>d</sup>                             |
| Hispanic                          | 20.2<br>(10.0, 36.7)      | — <sup>d</sup>                             |
| <b>Education</b>                  |                           |                                            |
| High school or less               | 23.2<br>(19.6, 27.3)      | — <sup>d</sup>                             |
| Some college                      | 27.4<br>(23.0, 32.4)      | — <sup>d</sup>                             |
| College diploma or greater        | 37.5<br>(31.0, 44.5)      | — <sup>d</sup>                             |
| <b>Income (Poverty Line)</b>      |                           |                                            |
| <100%                             | 14.6<br>(10.6, 19.7)      | — <sup>d</sup>                             |
| 100-200%                          | 20.5<br>(16.4, 25.2)      | — <sup>d</sup>                             |
| >200%                             | 35.5<br>(31.8, 39.3)      | — <sup>d</sup>                             |

Note. CI=confidence interval; y=years. Hearing loss severity is defined based on a four-frequency (0.5/1/2/4 kHz) pure tone average threshold for the better-hearing ear  $\geq 25$  dB HL.

Source. National Health Aging Trends Study. Data weighted according to study guidelines.

<sup>a</sup>NHATS 2021 cycle N=2004 participants with hearing loss

<sup>b</sup>Population numbers were computed using the estimated prevalence rate and the population totals by age group in the continental USA according to data from the 2020 Census Bureau, American Community Survey

<sup>c</sup>Prevalence estimates by race/ethnicity are only presented for the 3 largest racial/ethnic groups. Individuals from all racial/ethnic groups were included in all other prevalence estimations.

<sup>d</sup>Did not estimate total number.
