# Supplementary material for: Prevalence of Hearing Loss and Hearing Aid Use Among US Medicare Beneficiaries Aged 71 Years and Older
Source: PubMed Central journal article supplement (PMC10383002; doi:10.1001/jamanetworkopen.2023.26320), 2023-07-28
Supplement: jamanetwopen-e2326320-s002.pdf [file jamanetwopen-e2326320-s002.pdf]

## Data Sharing Statement

Reed. Prevalence of Hearing Loss and Hearing Aid Use Among US Medicare Beneficiaries Aged 71 Years and Older. *JAMA Netw Open*. Published July 28, 2023.

doi:10.1001/jamanetworkopen.2023.26320

### Data

**Data available:** No

### Additional Information

**Explanation for why data not available:** Data is already publicly available
